# Supplementary material
Source: ML conference proceedings conference paper supplement (https://openaccess.thecvf.com/content/ICCV2025/html/Yu_X2-Gaussian_4D_Radiative_ICCV_2025_paper.html)
Supplement: Supplementary file 1 [file Yu_X2-Gaussian_4D_Radiative_ICCV_2025_supplemental.pdf]

# X<sup>2</sup>-Gaussian: 4D Radiative Gaussian Splatting for Continuous-time Tomographic Reconstruction

## Supplementary Material

### 1. Details of Dataset

**DIR Dataset** We collected 4D CT scans from the DIR dataset [4], which were acquired from patients with malignant thoracic tumors (esophageal or lung cancer). Each 4D CT was divided into 10 3D CT volumes based on respiratory signals captured by a real-time position management respiratory gating system [7]. For each patient, the CT dimensions are  $256 \times 256$  in the x and y axes, while the z-axis dimension varies from 94 to 112 slices. The z-axis resolution is  $2.5 \text{ mm}$ , and the xy-plane resolution ranges between  $0.97$  and  $1.16 \text{ mm}$ . The CT scan coverage encompasses the entire thoracic region and upper abdomen. Following the approach in literature [3, 13], we preprocessed the original data by normalizing the density values to the range of  $[0, 1]$ . We simulated the classical one-minute sampling protocol used in clinical settings by uniformly sampling 300 paired time points and angles within a one-minute duration and a  $0$  to  $360$  angular range. Based on the respiratory phase corresponding to each timestamp, we selected the appropriate 3D CT volume, and then utilized the tomographic imaging toolbox TIGRE [1] to capture  $512 \times 512$  projections.

**4DLung Dataset** 4D CTs in 4DLung dataset [6] were collected from non-small cell lung cancer patients during their chemoradiotherapy treatment. All scans were respiratory-synchronized into 10 breathing phases. For each patient, the CT scans have dimensions of  $512 \times 512$  pixels in the transverse plane, with the number of axial slices varying between 91 and 135. The spatial resolution is  $0.9766$  to  $1.053 \text{ mm}$  in the transverse plane and  $3 \text{ mm}$  in the axial direction. Following the same pipeline as DIR dataset, We captured 300 projections with sizes of  $1024 \times 1024$ .

**SPARE Dataset** The 4D CT images from the SPARE dataset [11] have dimensions of  $450 \times 450$  pixels in the transverse plane and 220 slices in the axial direction, with an isotropic spatial resolution of  $1.0 \text{ mm}$  in all directions. Following the same methodology as the DIR dataset, we acquired 300 projections, each with dimensions of  $512 \times 512$  pixels.

### 2. Implementation details of baseline methods

We conducted comparison with various 3D reconstruction methods, which were directly applied to 4D reconstruction under the phase binning workflow. Traditional algorithm FDK [10] was implemented using the GPU-accelerated TIGRE toolbox [1]. We evaluated five SOTA NeRF-based

tomography methods: NeRF [9] (using MLP-based volumetric scene representation), IntraTomo [12] (using a large MLP for density field modeling), TensorRF [5] (utilizing tensor decomposition for efficient scene representation), NAF [13] (featuring hash encoding for faster training), and SAX-NeRF [3] (employing a line segment-based transformer). The implementations of NAF and SAX-NeRF used their official code with default hyperparameters, while NeRF, IntraTomo, and TensorRF were implemented using code from the NAF repository. All NeRF-based methods were trained for 150,000 iterations. We also evaluated three SOTA 3DGS-based methods: 3DGS [8] (introducing real-time rendering with 3D Gaussians), X-GS [2] (incorporating radiative properties into Gaussian Splatting), and R<sup>2</sup>-GS [14] (proposing a tomographic reconstruction approach to Gaussian Splatting). Since 3DGS and X-GS lack the capability for tomographic reconstruction, following [2], we leveraged their novel view synthesis abilities to generate an additional 100 X-ray images from new viewpoints for each 3D CT. These synthesized views, together with the training data, were used with the FDK algorithm to perform reconstruction. All 3DGS-based methods used their official code with default hyperparameters. All experiments were executed on a single NVIDIA RTX 4090 GPU.

### 3. More Quantitative Results

Tab. 1 and Tab. 2 present the comparative results for each patient in the 4DLung dataset and DIR dataset, respectively. Our method achieved optimal reconstruction results for nearly all patients across both datasets.

### References

- [1] Ander Biguri, Manjit Dosanjh, Steven Hancock, and Manuchehr Soleimani. Tigre: a matlab-gpu toolbox for cbct image reconstruction. *Biomed. Phys. Eng. Express*, 2(5): 055010, 2016. 1
- [2] Yuanhao Cai, Yixun Liang, Jiahao Wang, Angtian Wang, Yulun Zhang, Xiaokang Yang, Zongwei Zhou, and Alan Yuille. Radiative gaussian splatting for efficient x-ray novel view synthesis. In *Eur. Conf. Comput. Vis.*, pages 283–299. Springer, 2024. 1, 2
- [3] Yuanhao Cai, Jiahao Wang, Alan Yuille, Zongwei Zhou, and Angtian Wang. Structure-aware sparse-view x-ray 3d reconstruction. In *IEEE Conf. Comput. Vis. Pattern Recog.*, pages 11174–11183, 2024. 1
- [4] Richard Castillo, Edward Castillo, Rudy Guerra, Valen E Johnson, Travis McPhail, Amit K Garg, and Thomas Guerrero. A framework for evaluation of deformable image reg-

Table 1. Comparison of our X<sup>2</sup>-Gaussian with different methods on the 4DLung dataset.

| Method                  | Patient1     |              | Patient2     |              | Patient3     |              | Patient4     |              | Patient5     |              | Average      |              |
|-------------------------|--------------|--------------|--------------|--------------|--------------|--------------|--------------|--------------|--------------|--------------|--------------|--------------|
|                         | PSNR         | SSIM         |
| FDK [10]                | 27.36        | 0.646        | 22.98        | 0.410        | 28.48        | 0.662        | 28.76        | 0.654        | 27.59        | 0.684        | 27.03        | 0.611        |
| IntraTomo [12]          | 30.39        | 0.926        | 35.73        | 0.930        | 34.99        | 0.938        | 35.29        | 0.941        | 35.02        | 0.960        | 34.28        | 0.939        |
| TensoRF [5]             | 30.42        | 0.907        | 36.67        | 0.931        | 34.64        | 0.933        | 35.14        | 0.944        | 35.86        | 0.969        | 34.55        | 0.937        |
| NAF [13]                | 30.76        | 0.901        | 37.46        | 0.932        | 34.69        | 0.934        | 35.47        | <b>0.947</b> | 36.30        | 0.964        | 34.94        | 0.936        |
| X-GS [2]                | 30.62        | 0.709        | 25.16        | 0.526        | 31.45        | 0.722        | 30.88        | 0.773        | 29.98        | 0.792        | 29.62        | 0.705        |
| R <sup>2</sup> -GS [14] | 33.19        | 0.918        | 39.22        | 0.972        | 37.90        | 0.960        | 37.29        | 0.939        | 38.96        | 0.970        | 37.31        | 0.952        |
| Ours                    | <b>34.49</b> | <b>0.929</b> | <b>40.44</b> | <b>0.957</b> | <b>39.94</b> | <b>0.966</b> | <b>38.10</b> | 0.943        | <b>40.06</b> | <b>0.973</b> | <b>38.61</b> | <b>0.957</b> |

Table 2. Comparison of our X<sup>2</sup>-Gaussian with different methods on the SPARE dataset.

| Method                  | Patient1     |              | Patient2     |              | Patient3     |              | Average      |              |
|-------------------------|--------------|--------------|--------------|--------------|--------------|--------------|--------------|--------------|
|                         | PSNR         | SSIM         | PSNR         | SSIM         | PSNR         | SSIM         | PSNR         | SSIM         |
| FDK [10]                | 9.85         | 0.232        | 11.85        | 0.229        | 21.04        | 0.616        | 14.25        | 0.359        |
| IntraTomo [12]          | 27.55        | 0.889        | 27.83        | 0.864        | 26.48        | 0.860        | 27.29        | 0.871        |
| TensoRF [5]             | 26.88        | 0.863        | 27.21        | 0.832        | 26.64        | 0.877        | 26.91        | 0.857        |
| NAF [13]                | 28.67        | 0.908        | 29.25        | 0.880        | 27.39        | 0.892        | 28.44        | 0.893        |
| X-GS [2]                | 14.16        | 0.328        | 17.37        | 0.356        | 23.06        | 0.652        | 18.20        | 0.442        |
| R <sup>2</sup> -GS [14] | 30.04        | 0.907        | 32.06        | 0.901        | 31.26        | 0.916        | 31.12        | 0.908        |
| Ours                    | <b>31.38</b> | <b>0.920</b> | <b>32.47</b> | <b>0.907</b> | <b>32.87</b> | <b>0.939</b> | <b>32.24</b> | <b>0.922</b> |

istration spatial accuracy using large landmark point sets. *Phys. Med. Biol.*, 54(7):1849, 2009. 1

- [5] Anpei Chen, Zexiang Xu, Andreas Geiger, Jingyi Yu, and Hao Su. Tensorf: Tensorial radiance fields. In *Eur. Conf. Comput. Vis.*, pages 333–350. Springer, 2022. 1, 2
- [6] Geoffrey D Hugo, Elisabeth Weiss, William C Sleeman, Salim Balik, Paul J Keall, Jun Lu, and Jeffrey F Williamson. Data from 4d lung imaging of nslc patients. 2016. 1
- [7] Paul Keall. 4-dimensional computed tomography imaging and treatment planning. In *Semin. Radiat. Oncol.*, pages 81–90. Elsevier, 2004. 1
- [8] Bernhard Kerbl, Georgios Kopanas, Thomas Leimkühler, and George Drettakis. 3d gaussian splatting for real-time radiance field rendering. *ACM Trans. Graph.*, 42(4):139–1, 2023. 1
- [9] Ben Mildenhall, Pratul P Srinivasan, Matthew Tancik, Jonathan T Barron, Ravi Ramamoorthi, and Ren Ng. Nerf: Representing scenes as neural radiance fields for view synthesis. *Commun. ACM.*, 65(1):99–106, 2021. 1
- [10] Thomas Rodet, Frédéric Noo, and Michel Defrise. The cone-beam algorithm of feldkamp, davis, and kress preserves oblique line integrals. *Med. Phys.*, 31(7):1972–1975, 2004. 1, 2
- [11] Chun-Chien Shieh, Yesenia Gonzalez, Bin Li, Xun Jia, Simon Rit, Cyril Mory, Matthew Riblett, Geoffrey Hugo, Yawei Zhang, Zhuoran Jiang, et al. Spare: Sparse-view reconstruction challenge for 4d cone-beam ct from a 1-min scan. *Med. Phys.*, 46(9):3799–3811, 2019. 1
- [12] Guangming Zang, Ramzi Idoughi, Rui Li, Peter Wonka, and Wolfgang Heidrich. Intratomo: self-supervised learning-based tomography via sinogram synthesis and prediction. In *IEEE Conf. Comput. Vis. Pattern Recog.*, pages 1960–1970, 2021. 1, 2
- [13] Ruyi Zha, Yanhao Zhang, and Hongdong Li. Naf: neural attenuation fields for sparse-view cbct reconstruction. In *MIC-CAI*, pages 442–452. Springer, 2022. 1, 2
- [14] Ruyi Zha, Tao Jun Lin, Yuanhao Cai, Jiwen Cao, Yanhao Zhang, and Hongdong Li. R2-gaussian: Rectifying radiative gaussian splatting for tomographic reconstruction. *arXiv preprint arXiv:2405.20693*, 2024. 1, 2
